## CORRECTION

# Correction: Socio-economic factors as indicators for various animal diseases in Sardinia

Federica Loi, Alberto Laddomada, Annamaria Coccollone, Elena Marrocu, Toni Piseddu, Giovanna Masala, Ennio Bandino, Stefano Cappai, Sandro Rolesu

There is an error in [Table 3](#). [Table 3](#) is a duplicate of Table 2. Please see the complete, correct [Table 3](#) here.

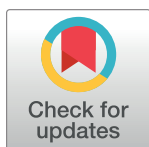

## OPEN ACCESS

**Citation:** Loi F, Laddomada A, Coccollone A, Marrocu E, Piseddu T, Masala G, et al. (2019) Correction: Socio-economic factors as indicators for various animal diseases in Sardinia. PLoS ONE 14(8): e0220945. <https://doi.org/10.1371/journal.pone.0220945>

**Published:** August 5, 2019

**Copyright:** © 2019 Loi et al. This is an open access article distributed under the terms of the [Creative Commons Attribution License](#), which permits unrestricted use, distribution, and reproduction in any medium, provided the original author and source are credited.

**Table 3. Negative Binomial Regression model results for African Swine Fever in domestic pigs, African wine fever in wild boar, Contagious Agalactia, West Nile disease, Bluetongue, Trichinellosis and Cistic Echinococcosis as outcome.** Data are reported as Adjusted Odds Ratio (OR<sub>adj</sub>), Confidence Interval at 95% and p-value.

| <b>OUTCOME:</b>                                                     |                         |               |                |
|---------------------------------------------------------------------|-------------------------|---------------|----------------|
| <b>Cases of African Swine Fever in domestic pigs</b>                | <b>OR<sub>adj</sub></b> | <b>95% CI</b> | <b>p-value</b> |
| N. farms (by 10 farms)                                              | 1.08                    | [1.02–1.11]   | 0.005          |
| N. animals (by 100 animals)                                         | 1.01                    | [1.01–1.02]   | < 0.0001       |
| Age of the farmer (by 5 years old)                                  | 0.80                    | [0.70–0.84]   | < 0.0001       |
| Sex of the farmer (female vs male)                                  | 0.51                    | [0.33–0.82]   | 0.005          |
| IDM quintile                                                        |                         |               |                |
| 1 (very wealthy)                                                    | Rif.                    | [0.56–1.37]   | 0.564          |
| 2 (wealthy)                                                         | 0.89                    | [1.70–2.44]   | < 0.0001       |
| 3 (medium)                                                          | 2.04                    | [1.70–2.95]   | < 0.0001       |
| 4 (deprived)                                                        | 2.23                    | [1.90–3.69]   | < 0.0001       |
| 5 (very deprived)                                                   | 2.64                    |               |                |
| Ind_013—Employment rate                                             | 0.77                    | [0.62–0.96]   | 0.019          |
| Ind_018—Cultural demand                                             | 0.95                    | [0.93–0.98]   | 0.001          |
| Ind_135—Micro criminality Index                                     | 1.46                    | [1.07–1.98]   | 0.016          |
| Ind_165—Tourism in not-summer period                                | 1.47                    | [1.31–1.65]   | < 0.0001       |
| Ind_278—Flood risk population (by 100 inhabitants/km <sup>2</sup> ) | 1.48                    | [1.11–1.99]   | 0.009          |
| Ind_279—Rate of reported thefts                                     | 1.58                    | [1.51–1.28]   | < 0.0001       |
| Ind_280—Rate of reported robberies                                  | 1.07                    | [1.03–1.13]   | 0.001          |
| <b>OUTCOME:</b>                                                     |                         |               |                |
| <b>Cases of African Swine Fever in wild boar</b>                    | <b>OR<sub>adj</sub></b> | <b>95% CI</b> | <b>p-value</b> |
| Ind_013—Employment rate                                             | 0.81                    | [0.66–0.99]   | 0.041          |
| Ind_018—Cultural demand                                             | 0.98                    | [0.95–0.99]   | 0.022          |
| Ind_052—Municipal differentiated waste                              | 1.49                    | [1.11–1.99]   | 0.009          |
| Ind_080—Energy produced from renewable sources                      | 0.57                    | [0.35–0.92]   | 0.023          |
| Ind_135—Micro criminality Index                                     | 1.93                    | [1.89–1.97]   | 0.001          |
| Ind_239—Forests surface (100 hectares)                              | 1.17                    | [1.08–1.20]   | < 0.0001       |
| Ind_278—Flood risk population (by 100 inhabitants/km <sup>2</sup> ) | 1.79                    | [1.65–1.97]   | 0.027          |
| Ind_279—Rate of reported thefts                                     | 2.65                    | [1.90–3.69]   | < 0.0001       |
| <b>OUTCOME:</b>                                                     |                         |               |                |
| <b>Cases of Contagious Agalactia</b>                                | <b>OR<sub>adj</sub></b> | <b>95% CI</b> | <b>p-value</b> |
| N. farms (by 10 farms)                                              | 1.18                    | [1.10–1.26]   | < 0.0001       |
| N. animals (by 100 animals)                                         | 1.01                    | [1.01–1.03]   | 0.038          |
| Age of the farmer (by 5 years old)                                  | 1.16                    | [1.01–1.33]   | 0.029          |
| Sex of the farmer (female vs male)                                  | 0.52                    | [0.37–0.74]   | < 0.0001       |
| Ind_018—Cultural demand                                             | 0.50                    | [0.39–0.65]   | < 0.0001       |
| Ind_083—Municipal waste                                             | 1.06                    | [1.02–1.10]   | 0.027          |
| Ind_135—Micro criminality Index                                     | 1.28                    | [1.03–1.60]   | 0.028          |
| Ind_165—Tourism in not-summer period                                | 1.58                    | [1.41–1.82]   | 0.002          |
| Ind_239—Forests surface (100 hectares)                              | 0.98                    | [0.96–0.99]   | 0.001          |
| Ind_278—Flood risk population (by 100 inhabitants/km <sup>2</sup> ) | 1.22                    | [1.03–1.45]   | 0.023          |
| Ind_279—Rate of reported thefts                                     | 1.03                    | [1.01–1.05]   | 0.004          |
| <b>OUTCOME:</b>                                                     |                         |               |                |
| <b>Cases of West Nile disease</b>                                   | <b>OR<sub>adj</sub></b> | <b>95% CI</b> | <b>p-value</b> |
| Ind_013—Employment rate                                             | 0.98                    | [0.89–0.99]   | < 0.0001       |
| Ind_018—Cultural demand                                             | 0.67                    | [0.47–0.95]   | 0.025          |
| Ind_080—Energy produced from renewable sources                      | 0.32                    | [0.21–0.48]   | < 0.0001       |
| Ind_239—Forests surface (100 hectares)                              | 0.51                    | [0.32–0.81]   | 0.005          |
| Ind_278—Flood risk population (by 100 inhabitants/km <sup>2</sup> ) | 1.13                    | [1.02–1.25]   | 0.016          |
| <b>OUTCOME:</b>                                                     |                         |               |                |
| <b>Cases of Bluetongue</b>                                          | <b>OR<sub>adj</sub></b> | <b>95% CI</b> | <b>p-value</b> |

(Continued)

Table 3. (Continued)

| <b>OUTCOME:</b>                                                     |                         |               |                |
|---------------------------------------------------------------------|-------------------------|---------------|----------------|
| <b>Cases of African Swine Fever in domestic pigs</b>                | <b>OR<sub>adj</sub></b> | <b>95% CI</b> | <b>p-value</b> |
| N. animals (by 100 animals)                                         | 1.16                    | [1.03–1.31]   | 0.013          |
| Ind_012—Unemployment rate                                           | 1.21                    | [1.02–1.44]   | 0.029          |
| Ind_018—Cultural demand                                             | 0.98                    | [0.97–0.98]   | < 0.0001       |
| Ind_105—Tourism rate                                                | 0.95                    | [0.91–0.97]   | 0.002          |
| Ind_239—Forests surface (100 hectares)                              | 0.45                    | [0.22–0.76]   | 0.011          |
| Ind_265—Air quality monitoring                                      | 0.63                    | [0.45–0.77]   | < 0.0001       |
| Ind_278—Flood risk population (by 100 inhabitants/km <sup>2</sup> ) | 1.27                    | [1.04–1.56]   | 0.019          |
| Ind_281—Homicide rate                                               | 1.31                    | [1.06–1.63]   | 0.001          |
| <b>OUTCOME:</b>                                                     |                         |               |                |
| <b>Cases of Trichinellosis</b>                                      | <b>OR<sub>adj</sub></b> | <b>95% CI</b> | <b>p-value</b> |
| N. farms (by 10 farms)                                              | 1.01                    | [1.01–1.02]   | < 0.0001       |
| N. animals (by 100 animals)                                         | 1.07                    | [1.02–1.12]   | 0.006          |
| Age of the farmer (by 5 years old)                                  | 1.19                    | [1.05–1.35]   | 0.008          |
| Sex of the farmer (female vs male)                                  | 0.89                    | [0.80–0.98]   | < 0.0001       |
| IDM quintile                                                        |                         |               |                |
| 1 (very wealthy)                                                    | Rif.                    | [0.32–2.28]   | 0.721          |
| 2 (wealthy)                                                         | 0.84                    | [1.25–2.51]   | 0.001          |
| 3 (medium)                                                          | 1.77                    | [1.45–6.09]   | 0.003          |
| 4 (deprived)                                                        | 2.70                    | [1.22–2.19]   | 0.001          |
| 5 (very deprived)                                                   | 1.64                    |               |                |
| Ind_013—Employment rate                                             | 0.92                    | [0.87–0.97]   | 0.004          |
| Ind_018—Cultural demand                                             | 0.82                    | [0.72–0.94]   | 0.003          |
| Ind_080—Energy produced from renewable sources                      | 0.13                    | [0.04–0.42]   | 0.001          |
| Ind_135—Micro criminality Index                                     | 1.16                    | [1.03–1.31]   | 0.013          |
| Ind_165—Tourism in not-summer period                                | 1.65                    | [1.23–2.18]   | 0.001          |
| Ind_279—Rate of reported thefts                                     | 1.30                    | [1.11–1.51]   | 0.001          |
| Ind_281—Homicides rate                                              | 2.31                    | [1.11–4.80]   | 0.025          |
| <b>OUTCOME:</b>                                                     |                         |               |                |
| <b>Cases of Cistic Echinococcosis</b>                               | <b>OR<sub>adj</sub></b> | <b>95% CI</b> | <b>p-value</b> |
| N. farms (by 10 farms)                                              | 1.01                    | [1.01–1.18]   | 0.036          |
| N. animals (by 100 animals)                                         | 1.01                    | [1.01–1.09]   | < 0.0001       |
| Age of the farmer (by 5 years)                                      | 0.98                    | [0.96–0.99]   | 0.001          |
| Sex of the farmer (female vs male)                                  | 0.84                    | [0.82–0.86]   | < 0.0001       |
| IDM quintile                                                        |                         |               |                |
| 1 (very wealthy)                                                    | Rif.                    | [0.91–1.05]   | 0.585          |
| 2 (wealthy)                                                         | 0.98                    | [1.02–1.08]   | < 0.0001       |
| 3 (medium)                                                          | 1.05                    | [1.02–3.81]   | 0.047          |
| 4 (deprived)                                                        | 1.95                    | [3.54–3.94]   | < 0.0001       |
| 5 (very deprived)                                                   | 3.73                    |               |                |
| Ind_013—Employment rate                                             | 0.91                    | [0.86–0.97]   | 0.003          |
| Ind_018—Cultural demand                                             | 0.84                    | [0.67–0.86]   | 0.004          |
| Ind_044—Air traffic index                                           | 0.98                    | [0.97–0.99]   | < 0.0001       |
| Ind_105—Tourism rate                                                | 0.94                    | [0.92–0.97]   | < 0.0001       |
| Ind_135—Micro criminality Index                                     | 1.21                    | [1.11–1.29]   | < 0.0001       |
| Ind_141—Hospital emigration                                         | 0.72                    | [0.63–0.83]   | < 0.0001       |
| Ind_278—Flood risk population (by 100 inhabitants/km <sup>2</sup> ) | 1.19                    | [1.08–1.32]   | 0.001          |
| Ind_279—Rate of reported thefts                                     | 1.02                    | [1.01–1.03]   | < 0.0001       |
| Ind_280—Rate of reported robberies                                  | 1.43                    | [1.41–1.46]   | < 0.0001       |
| Ind_281—Homicide rate                                               | 1.31                    | [1.26–1.35]   | < 0.0001       |

<https://doi.org/10.1371/journal.pone.0220945.t001>

## Reference

1. Loi F, Laddomada A, Coccollone A, Marrocu E, Piseddu T, Masala G, et al. (2019) Socio-economic factors as indicators for various animal diseases in Sardinia. PLoS ONE 14(6): e0217367. <https://doi.org/10.1371/journal.pone.0217367> PMID: 31158242
